# Supplementary material for: Discussing the performance of beta zeolites in aqueous-phase valorization of xylose
Source: Royal Society of Chemistry journal article supplement (doi:10.1039/d0cy01176b), 2020-01-01

## Electronica Supplementary Material (ESM)

**Discussing the performance of beta zeolites in aqueous-phase valorization of xylose**

Tiago L. Coelho, Bruna Marinho, Elise M. Albuquerque, Marco A. Fraga\*

Instituto Nacional de Tecnologia/MCTIC, Divisão de Catálise e Processos Químicos, Av. Venezuela, 82, sala 518, 20081-312 Rio de Janeiro – RJ –Brazil

\*Corresponding author. E-mail address: [marco.fraga@int.gov.br](mailto:marco.fraga@int.gov.br)

Fig. SM1. FTIR of hydrated SiAl12 catalyst under different time of evacuation (from 0 to 240 min).

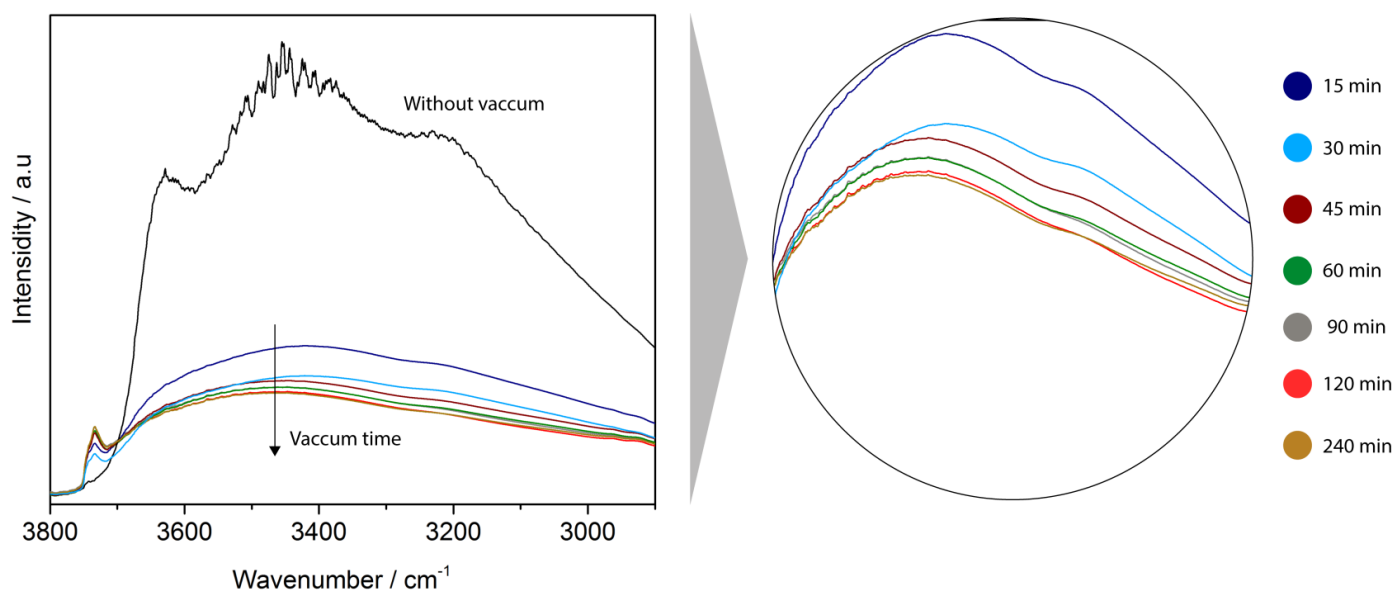

Figure SM2. X-ray diffractograms of fresh zeolites SiAl8, SiAl12 and SiAl19.

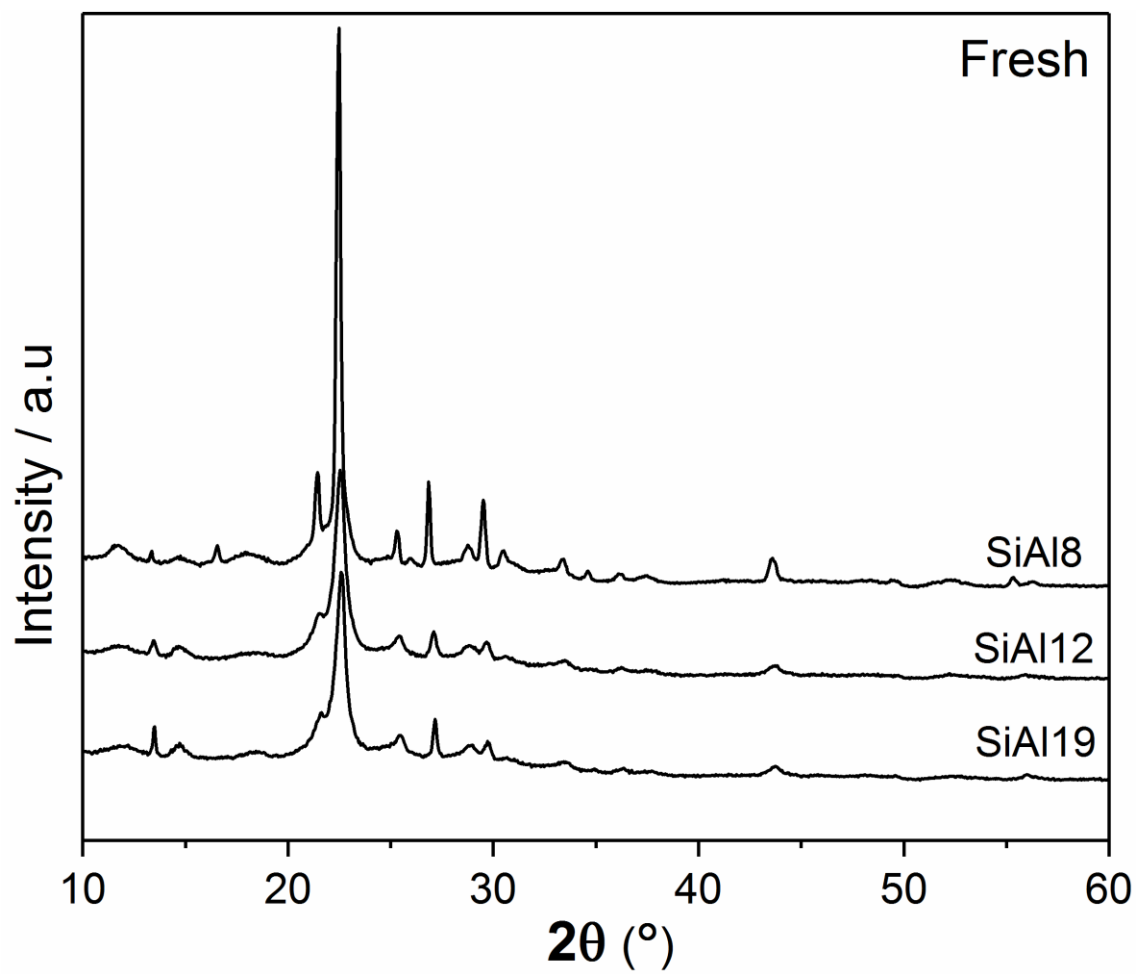

Figure SM3.  $^{29}\text{Si}$  NMR spectra for SiAl8 and SiAl12 zeolites. (a) experimental and deconvoluted spectra for (b) SiAl8 and (c) SiAl12.

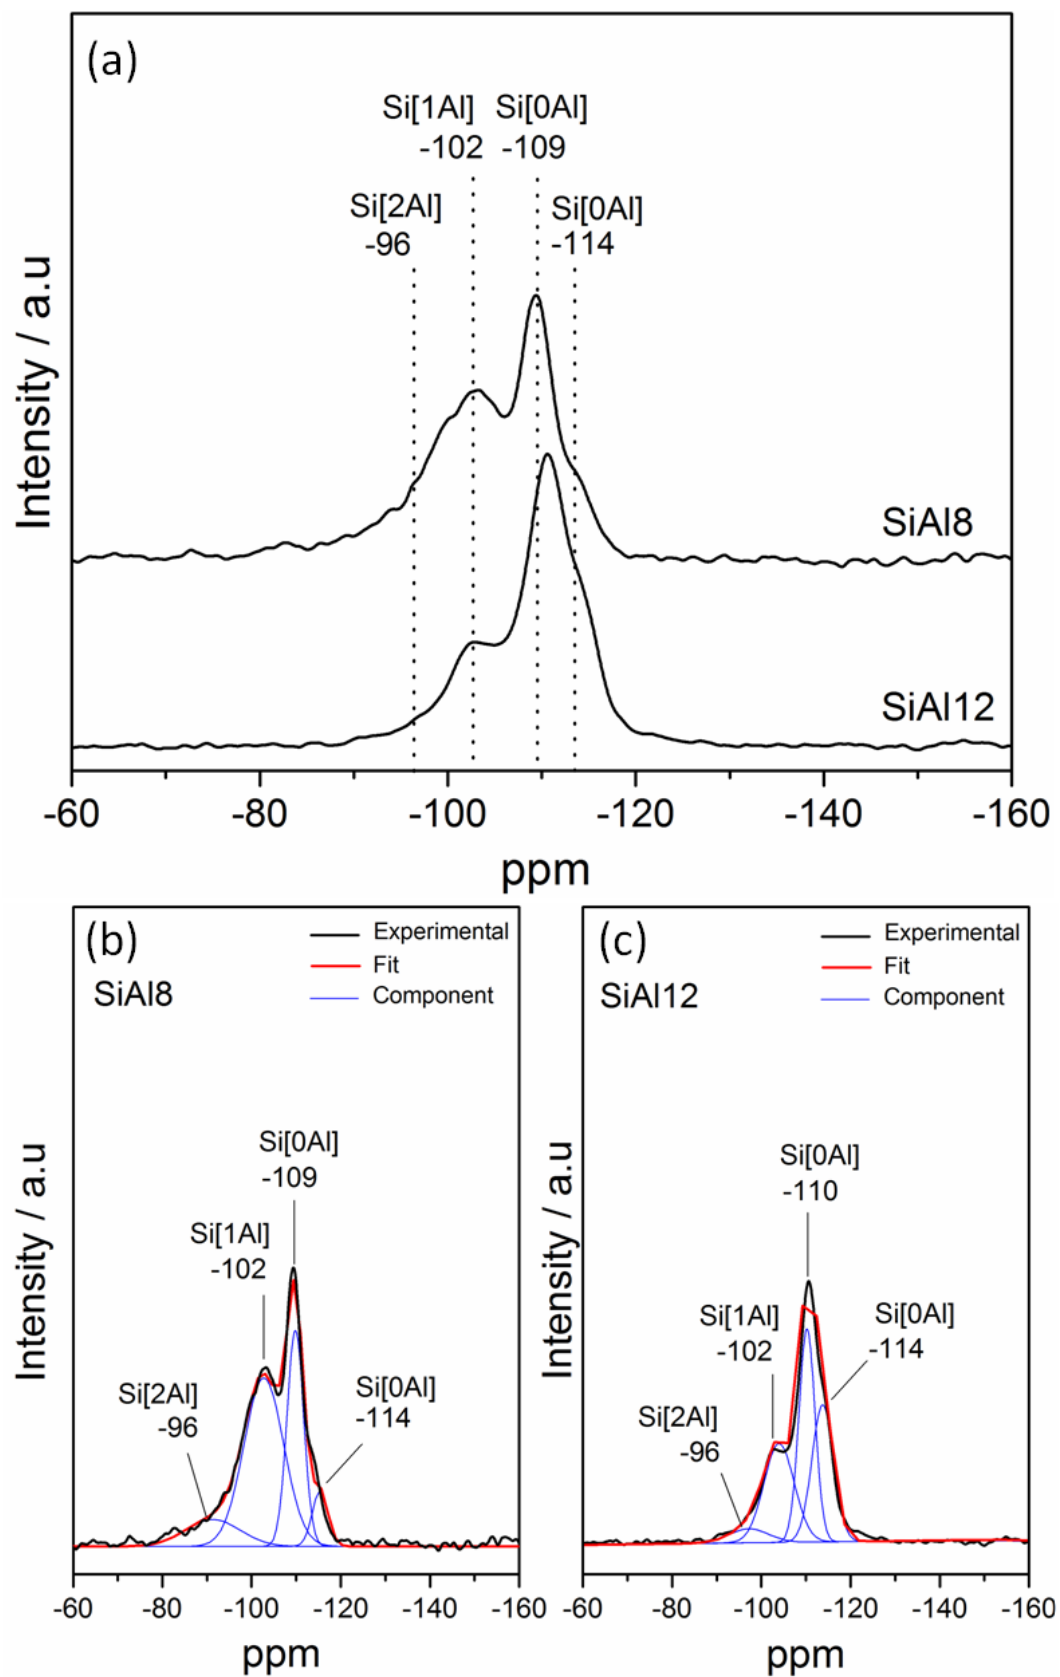

Figure SM4.  $^{27}\text{Al}$  NMR spectra for fresh zeolites.

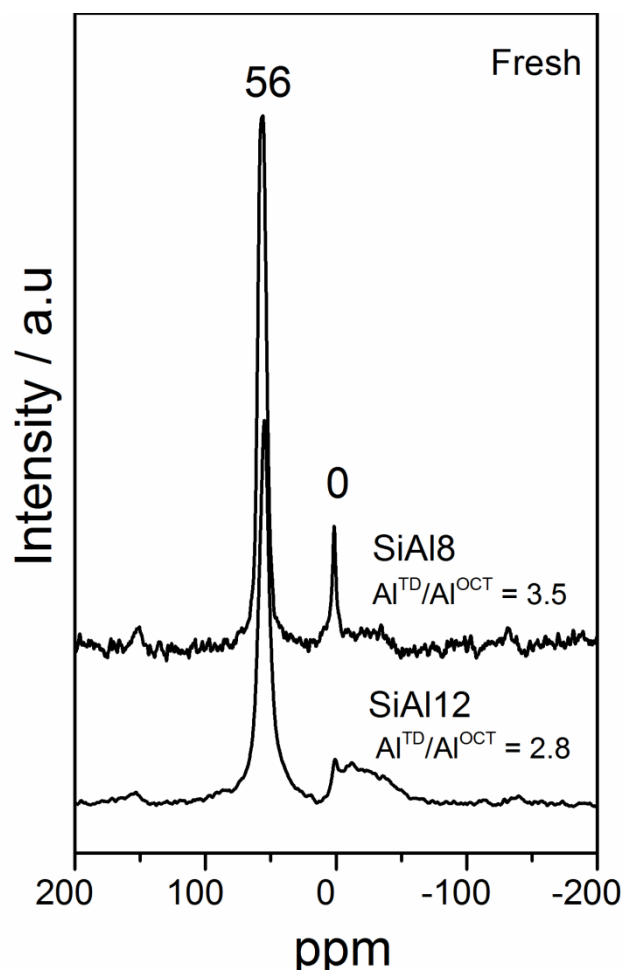

Figure SM5.  $^{27}\text{Al}$  NMR spectra for SiAl8, SiAl12 and SiAl19 dehydrated zeolites.

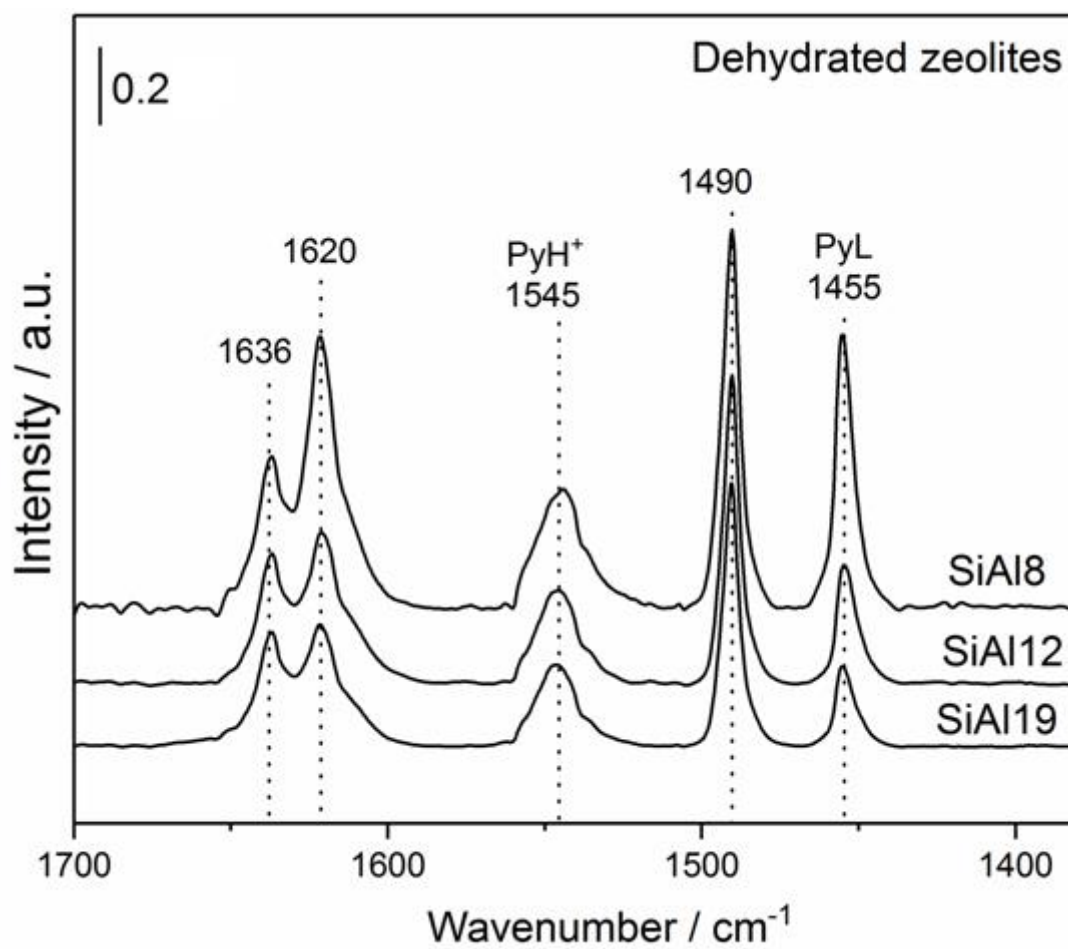

Table SM1. Concentration of Brønsted and Lewis acid sites calculated by IR of adsorbed pyridine for dehydrated zeolites.

| Catalysts | Brønsted acid sites<br>( $\mu\text{mol g}^{-1}$ ) | Lewis acid sites<br>( $\mu\text{mol g}^{-1}$ ) | Lewis<br>/Brønsted | Total acid<br>sites<br>( $\mu\text{mol g}^{-1}$ ) |
|-----------|---------------------------------------------------|------------------------------------------------|--------------------|---------------------------------------------------|
| SiAl8     | 340                                               | 600                                            | 1.76               | 940                                               |
| SiAl12    | 230                                               | 285                                            | 1.24               | 515                                               |
| SiAl19    | 190                                               | 165                                            | 0.87               | 355                                               |

Figure SM6. X-ray diffraction of spent zeolites.

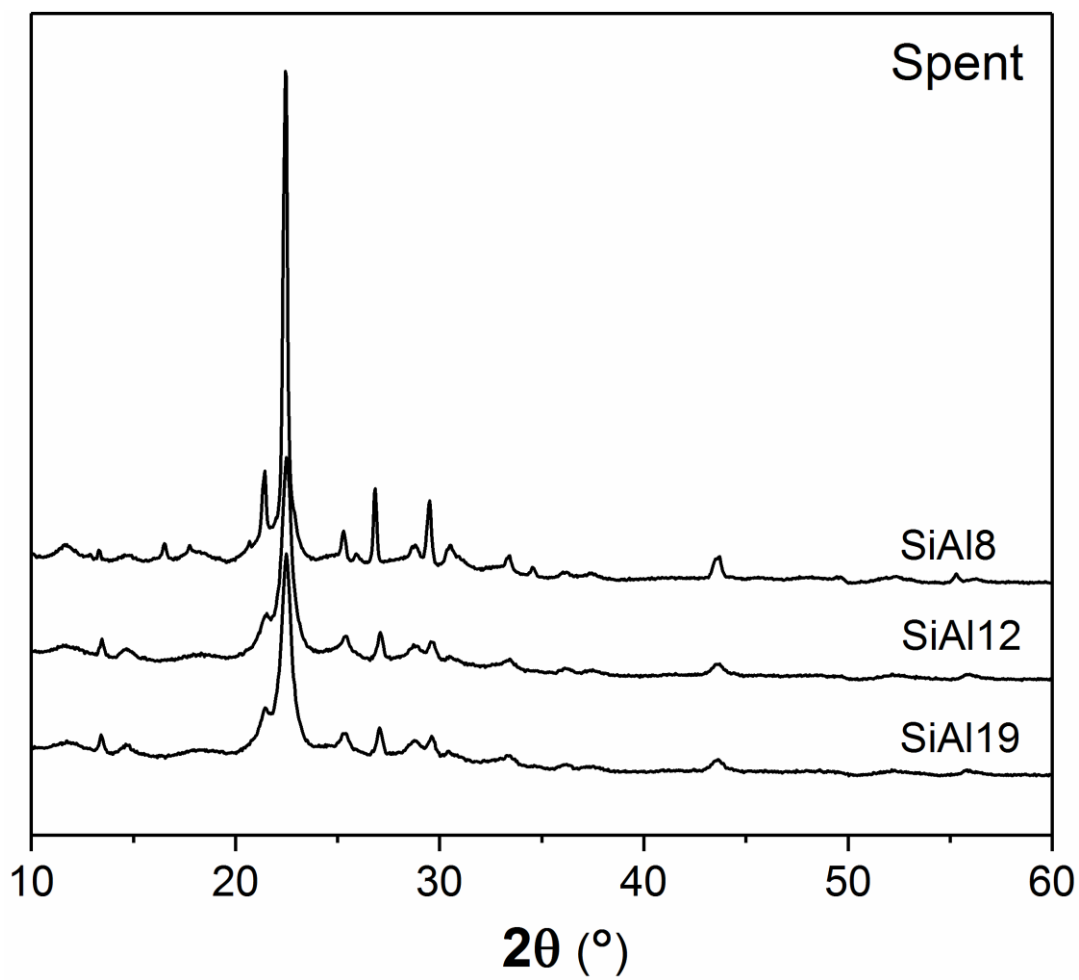



Figure SM7.  $^{29}\text{Si}$  NMR spectra for spent SiAl8 and SiAl12 zeolites.

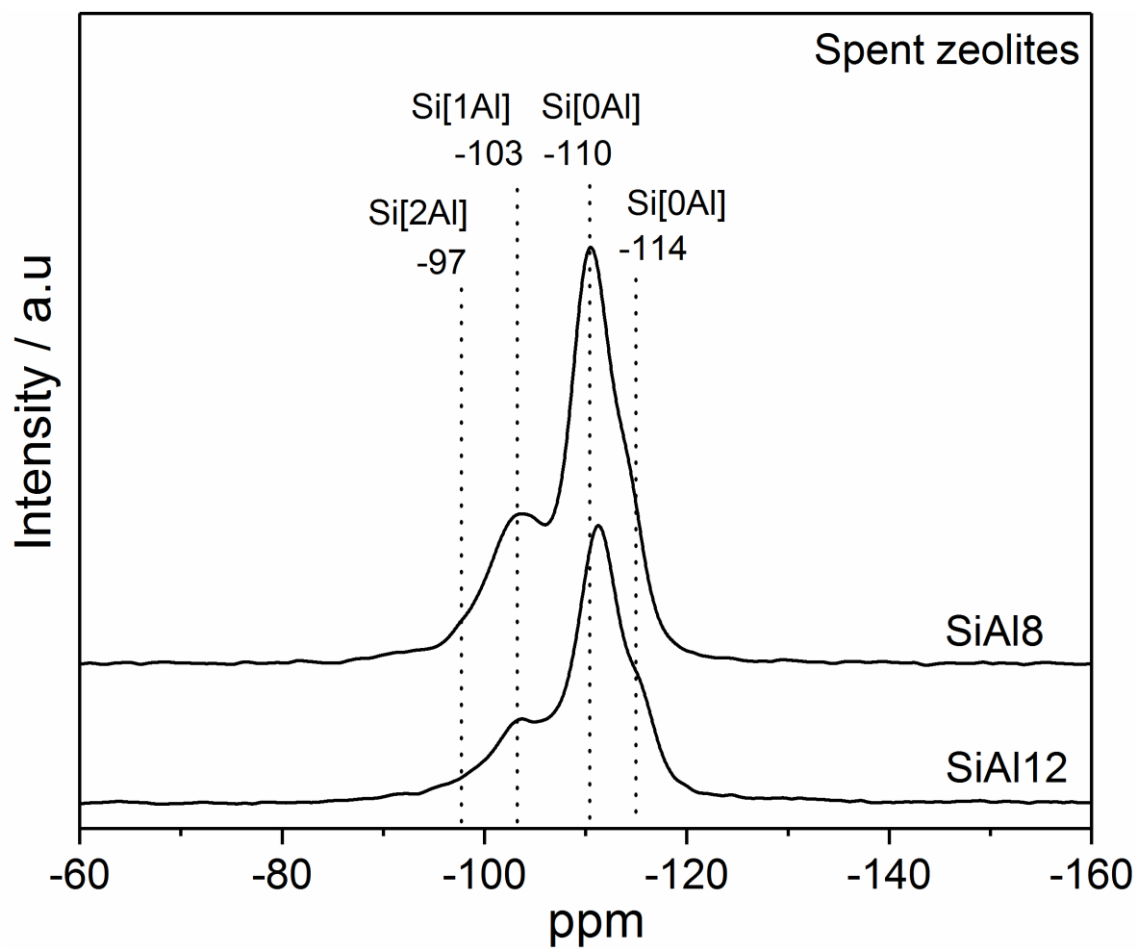

Figure SM8.  $^{27}\text{Al}$  NMR spectra for spent zeolites.

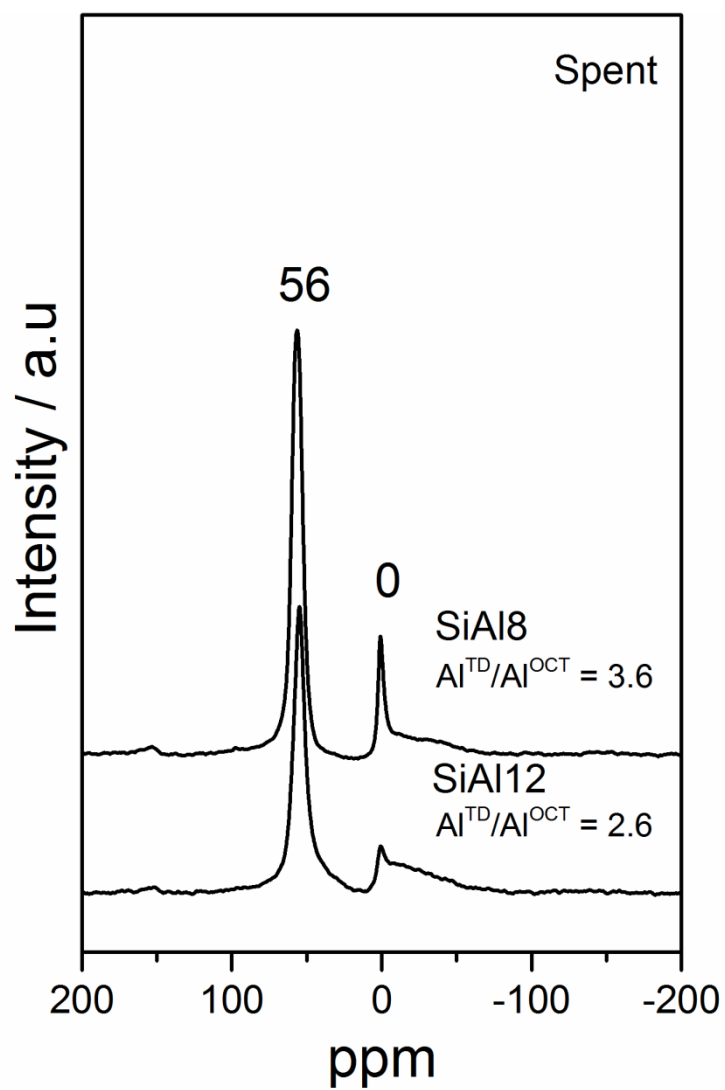

Figure SM9. Correlations between initial rate and acid sites in all three dehydrated zeolites catalysts.

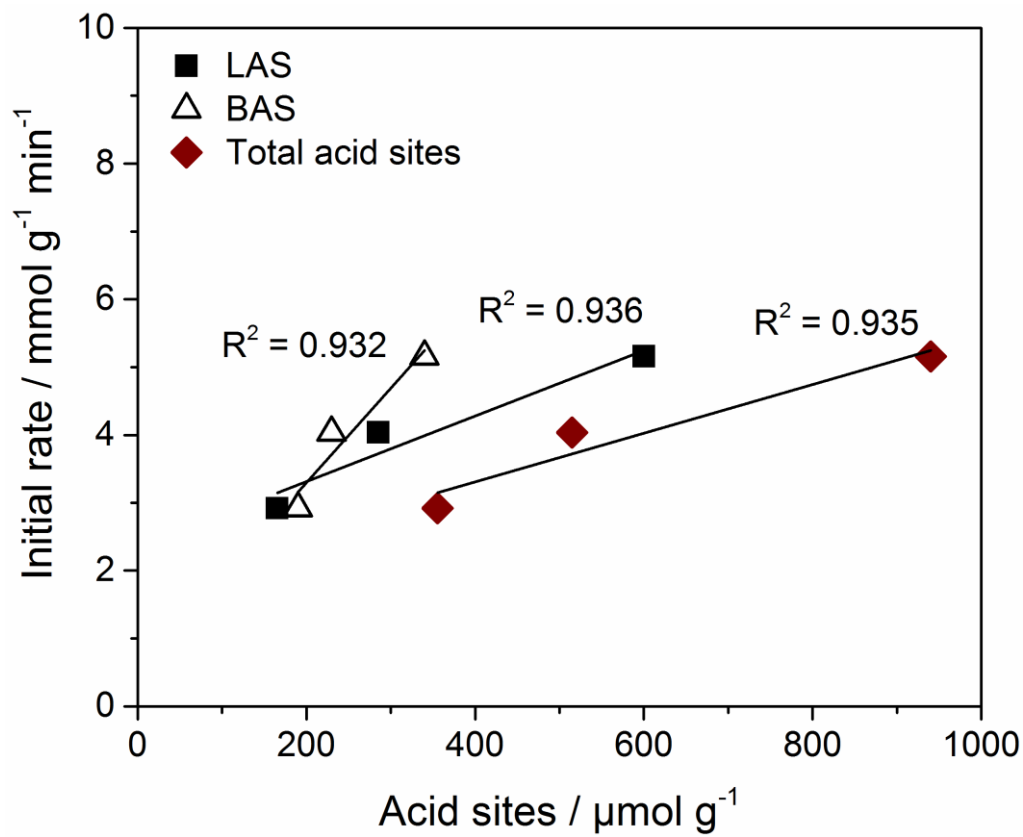

Figure SM10. Time-resolved xylose conversions for all three zeolite catalysts in the early reaction time region.

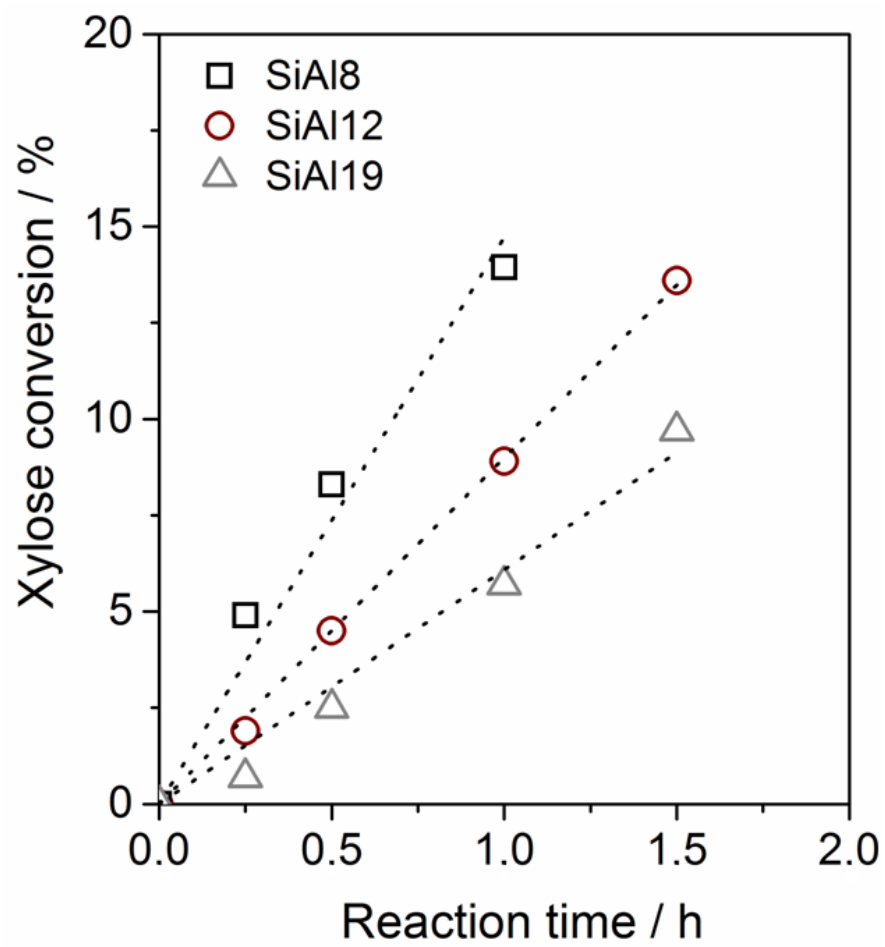

Figure SM11. Photo of aliquots and SiAl12 sample after 6 h of reaction at 130, 150 and 170 °C.

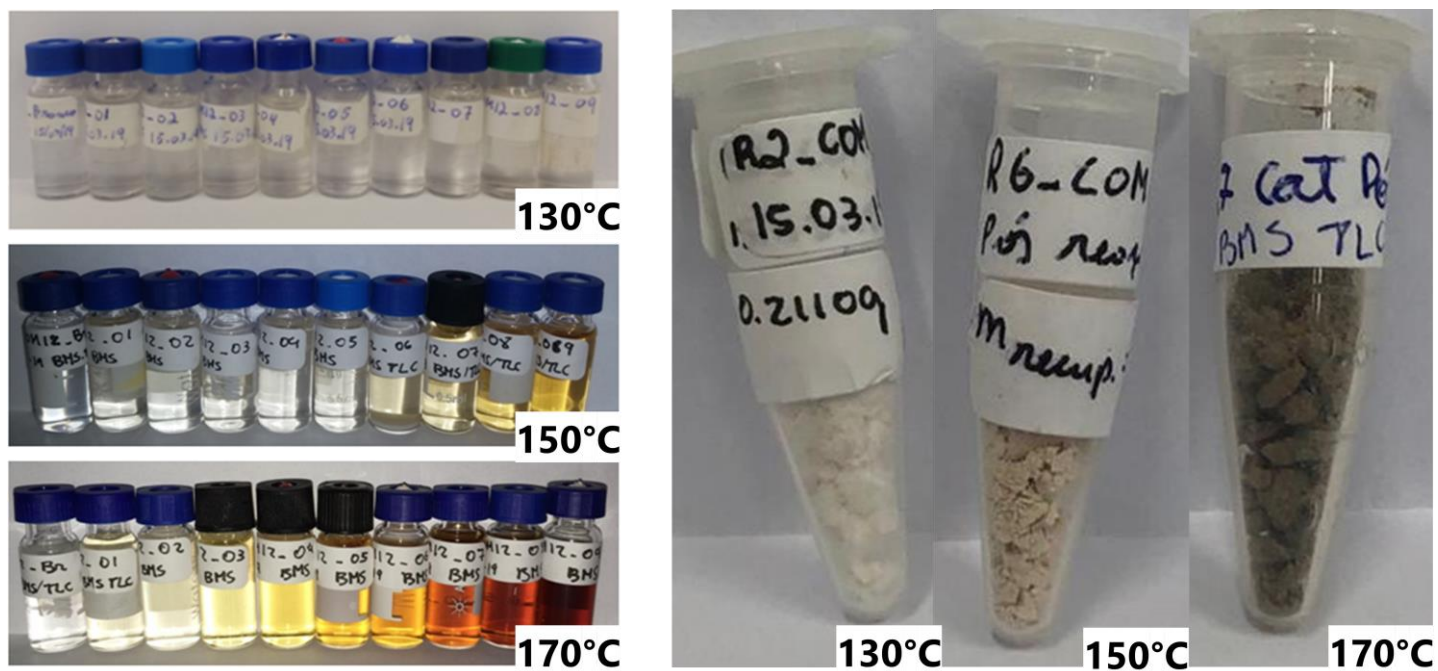

Supplement: d0cy01176b1.pdf [file d0cy01176b1.pdf]
